# Supplementary material for: Comparative studies on the contribution of NH⋯S hydrogen bonds in tungsten and molybdenum benzenedithiolate complexes
Source: Royal Society of Chemistry journal article supplement (doi:10.1039/c6dt02250b), 2016-01-01
Supplement: c6dt02250b1.pdf [file c6dt02250b1.pdf]

**Supplementary Information:**

**Comparative studies on the contribution of NH $\cdots$ S hydrogen bonds in tungsten and molybdenum benzenedithiolate complexes**

Taka-aki Okamura\*, Yui Omi, Yasunori Hirano and Kiyotaka Onitsuka

Department of Macromolecular Science, Graduate School of Science, Osaka University, Toyonaka,  
Osaka 560-0043, Japan

E-mail: tokamura@chem.sci.osaka-u.ac.jp

**Table S1** Crystallographic data

|                                                               | <b>1b-W</b> ·CH <sub>3</sub> CN                                                | <b>3-W</b> ·5/2CH <sub>3</sub> CN                                                  | <b>3-Mo</b> ·5/2CH <sub>3</sub> CN                                                 | <b>6</b> ·CH <sub>3</sub> CN                                                   |
|---------------------------------------------------------------|--------------------------------------------------------------------------------|------------------------------------------------------------------------------------|------------------------------------------------------------------------------------|--------------------------------------------------------------------------------|
| formula                                                       | C <sub>40</sub> H <sub>69</sub> N <sub>5</sub> O <sub>3</sub> S <sub>4</sub> W | C <sub>53</sub> H <sub>91.5</sub> N <sub>8.5</sub> O <sub>5</sub> S <sub>4</sub> W | C <sub>53</sub> H <sub>91.5</sub> MoN <sub>8.5</sub> O <sub>5</sub> S <sub>4</sub> | C <sub>51</sub> H <sub>82</sub> N <sub>6</sub> O <sub>3</sub> S <sub>6</sub> W |
| fw                                                            | 980.09                                                                         | 1239.93                                                                            | 1152.02                                                                            | 3378.34                                                                        |
| cryst syst                                                    | monoclinic                                                                     | monoclinic                                                                         | monoclinic                                                                         | monoclinic                                                                     |
| space group                                                   | <i>P2<sub>1</sub>/c</i>                                                        | <i>C2/c</i>                                                                        | <i>C2/c</i>                                                                        | <i>P2<sub>1</sub>/c</i>                                                        |
| <i>a</i> , Å                                                  | 17.7336(12)                                                                    | 36.772(6)                                                                          | 36.769(6)                                                                          | 11.4233(4)                                                                     |
| <i>b</i> , Å                                                  | 17.9441(5)                                                                     | 16.687(2)                                                                          | 16.624(3)                                                                          | 28.3088(11)                                                                    |
| <i>c</i> , Å                                                  | 15.2516(4)                                                                     | 26.502(4)                                                                          | 26.525(4)                                                                          | 18.3378(13)                                                                    |
| $\alpha$ , deg                                                | 90                                                                             | 90                                                                                 | 90                                                                                 | 90                                                                             |
| $\beta$ , deg                                                 | 110.304(7)                                                                     | 127.642(4)                                                                         | 127.696(5)                                                                         | 95.752(7)                                                                      |
| $\gamma$ , deg                                                | 90                                                                             | 90                                                                                 | 90                                                                                 | 90                                                                             |
| <i>V</i> , Å <sup>3</sup>                                     | 4551.7(4)                                                                      | 12877(3)                                                                           | 12829(4)                                                                           | 5900.2(5)                                                                      |
| <i>Z</i>                                                      | 4                                                                              | 8                                                                                  | 8                                                                                  | 4                                                                              |
| <i>d</i> <sub>calc</sub> , g cm <sup>-3</sup>                 | 1.430                                                                          | 1.279                                                                              | 1.193                                                                              | 1.355                                                                          |
| $\mu$ , mm <sup>-1</sup>                                      | 2.762                                                                          | 1.971                                                                              | 0.382                                                                              | 2.213                                                                          |
| GOF                                                           | 1.097                                                                          | 1.031                                                                              | 1.037                                                                              | 1.116                                                                          |
| <i>R</i> 1 <sup>a</sup> [ <i>I</i> > 2 $\sigma$ ( <i>I</i> )] | 0.0491                                                                         | 0.0520                                                                             | 0.0599                                                                             | 0.0584                                                                         |
| <i>wR</i> 2 <sup>b</sup> (all data)                           | 0.1118                                                                         | 0.1374                                                                             | 0.1743                                                                             | 0.1401                                                                         |

$${}^a R1 = \Sigma ||F_o| - |F_c|| / \Sigma |F_o|. \quad {}^b wR2 = \{ \Sigma [w(F_o^2 - F_c^2)^2] / \Sigma [w(F_o^2)^2] \}^{1/2}$$

**Table S2** <sup>1</sup>H NMR signals of **1a-M**—**1c-M** (**M** = **W**, **Mo**<sup>a</sup>) in acetonitrile-*d*<sub>3</sub> at 30 °C

|                           | NH                 |      | 4-H  |      | 6-H  |      | 5-H  |      |
|---------------------------|--------------------|------|------|------|------|------|------|------|
| <b>1a-W</b>               | 9.00               | 8.98 | 7.76 | 7.75 | 7.51 | 7.50 | 6.85 | 6.85 |
| <b>1a-Mo</b> <sup>b</sup> | 8.93               |      | 7.72 |      | 7.23 |      | 6.71 |      |
| <b>1b-W</b>               | 9.41               | 9.39 | 7.87 | 7.86 | 7.51 | 7.51 | 6.86 | 6.86 |
| <b>1b-Mo</b>              | 9.40               | 9.38 | 7.89 | 7.88 | 7.32 | 7.31 | 6.80 | 6.79 |
| <b>1c-W</b> <sup>c</sup>  | 10.00              |      | 7.71 |      | 7.64 |      | 6.94 |      |
| <b>1c-Mo</b>              | 10.02 <sup>b</sup> |      | 7.75 |      | 7.47 |      | 6.88 |      |

<sup>a</sup>Ref. 28. <sup>b</sup>Broad signals including *trans*- and *cis*-isomers. <sup>c</sup>Single isomer.

**Table S3**  $^1\text{H}$  NMR signals of **2a-M**—**2c-M** ( $\text{M} = \text{W}, \text{Mo}^a$ ) in acetonitrile- $d_3$  at 30 °C

|              | NH   | 4-H  | 6-H  | 5-H  |
|--------------|------|------|------|------|
| <b>2a-W</b>  | 8.37 | 7.67 | 6.86 | 6.64 |
| <b>2a-Mo</b> | 8.43 | 7.70 | 6.87 | 6.60 |
| <b>2b-W</b>  | 8.75 | 7.78 | 6.86 | 6.66 |
| <b>2b-Mo</b> | 8.82 | 7.81 | 6.86 | 6.61 |
| <b>2c-W</b>  | 9.44 | 7.64 | 7.01 | 6.73 |
| <b>2c-Mo</b> | 9.54 | 7.68 | 7.02 | 6.69 |

<sup>a</sup>Ref. 28.

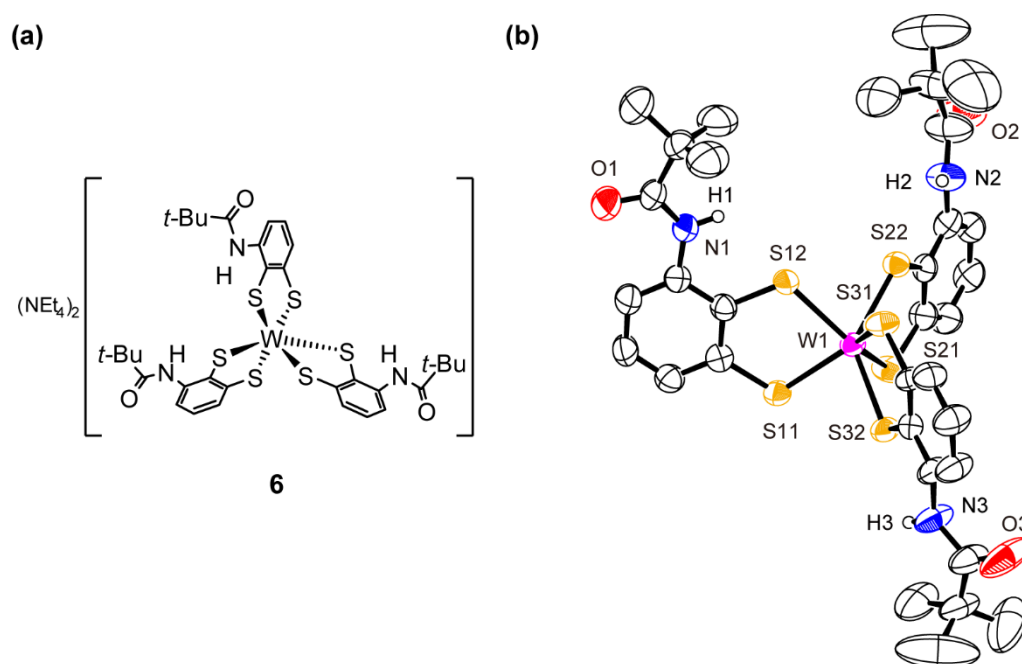

**Fig. S1** (a) Schematic drawing of **6**. (b) Molecular structure (anion part) of **6** showing a unique up-up-down orientation of the three *t*-BuCONH substituent groups. Solution  $^1\text{H}$ -NMR spectra showed only one set of broad signals for the ligand in acetonitrile- $d_3$ , suggesting that rapid conformational change occurs in solution on the NMR timescale.

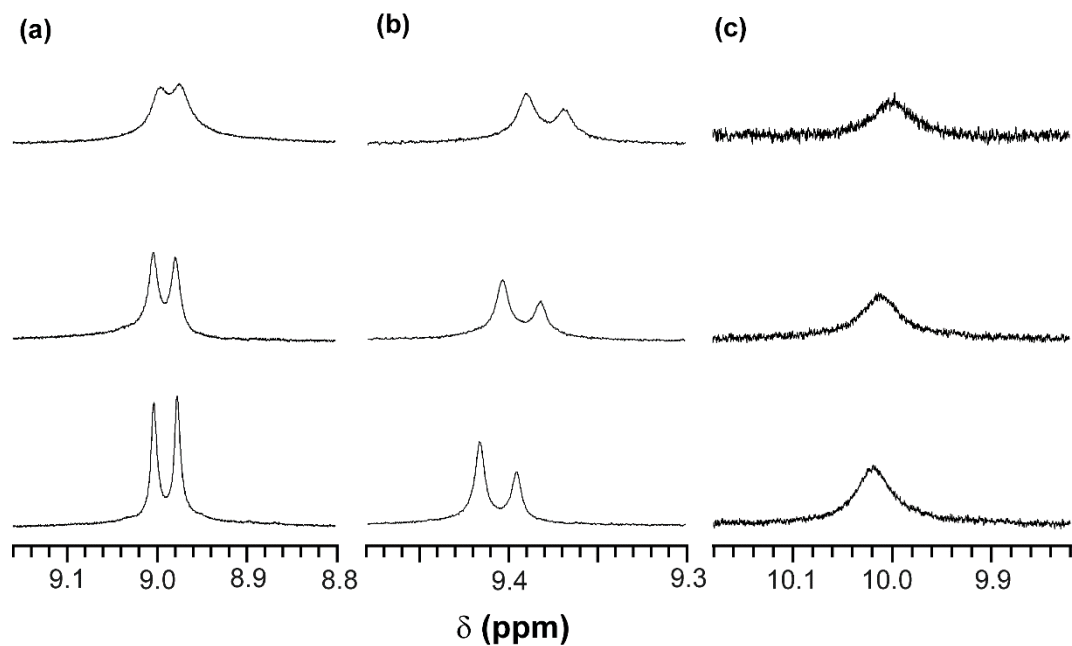

**Fig. S2**  $^1\text{H}$  NMR NH signals of (a) **1a-W**, (b) **1b-W** (powder), and (c) **1c-W** in acetonitrile- $d_3$  at 30 (top), 0 (middle), and -30 °C (bottom).

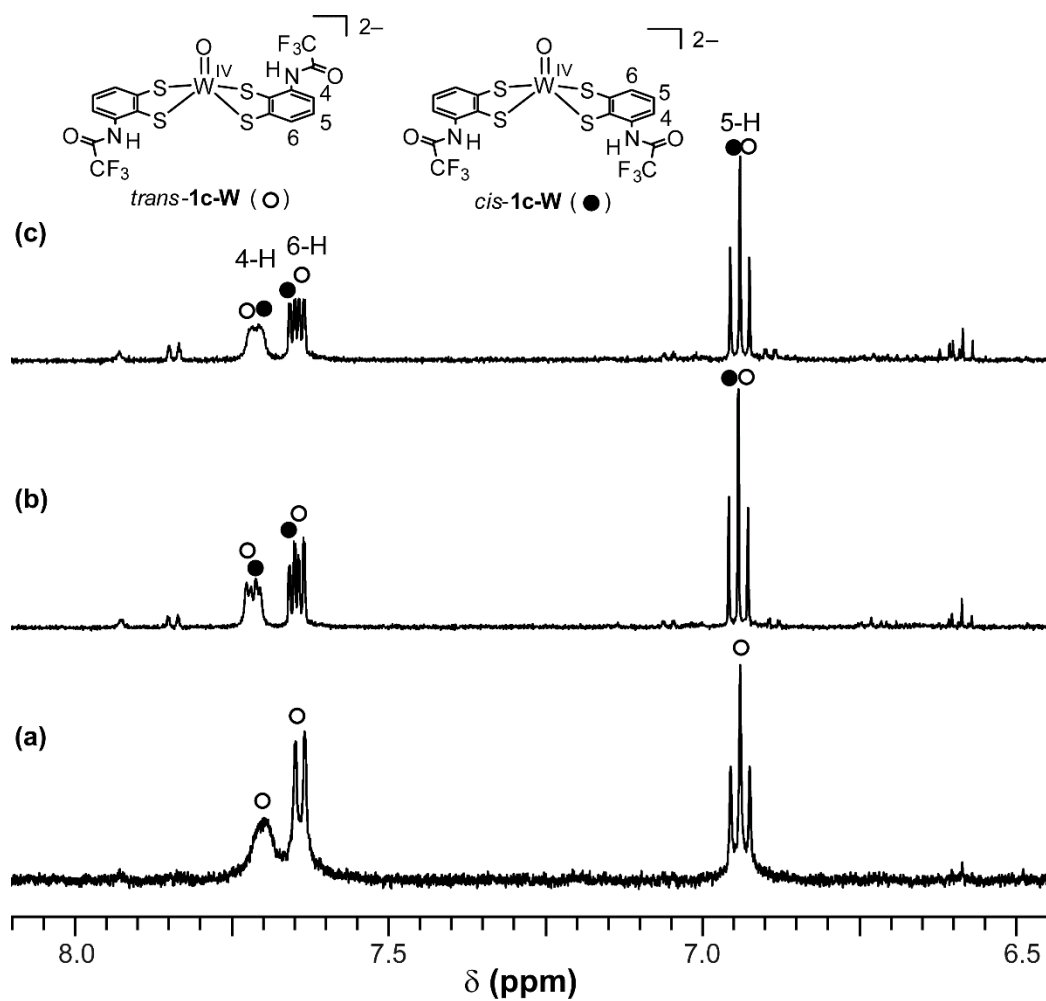

**Fig. S3**  $^1\text{H}$  NMR spectra of **1c-W** in acetonitrile- $d_3$  at 30 °C: (a) *trans*-**1c-W** (isolated microcrystals), (b) heated at 50 °C for 6.5 h, and (c) heated at 50 °C for 24 h.
